# Supplementary material for: Repositioning Fenofibrate to Reactivate p53 and Reprogram the Tumor-Immune Microenvironment in HPV+ Head and Neck Squamous Cell Carcinoma
Source: MDPI journal article supplement (doi:10.3390/cancers14020282), 2022-01-07
Supplement: s1 [file s1]

**Figure S1. PPAR $\gamma$ -selective agonist, rosiglitazone, and Wnt inhibitors, FH535 and C5, inhibit cell proliferation in HPV16+ HNSCC.**

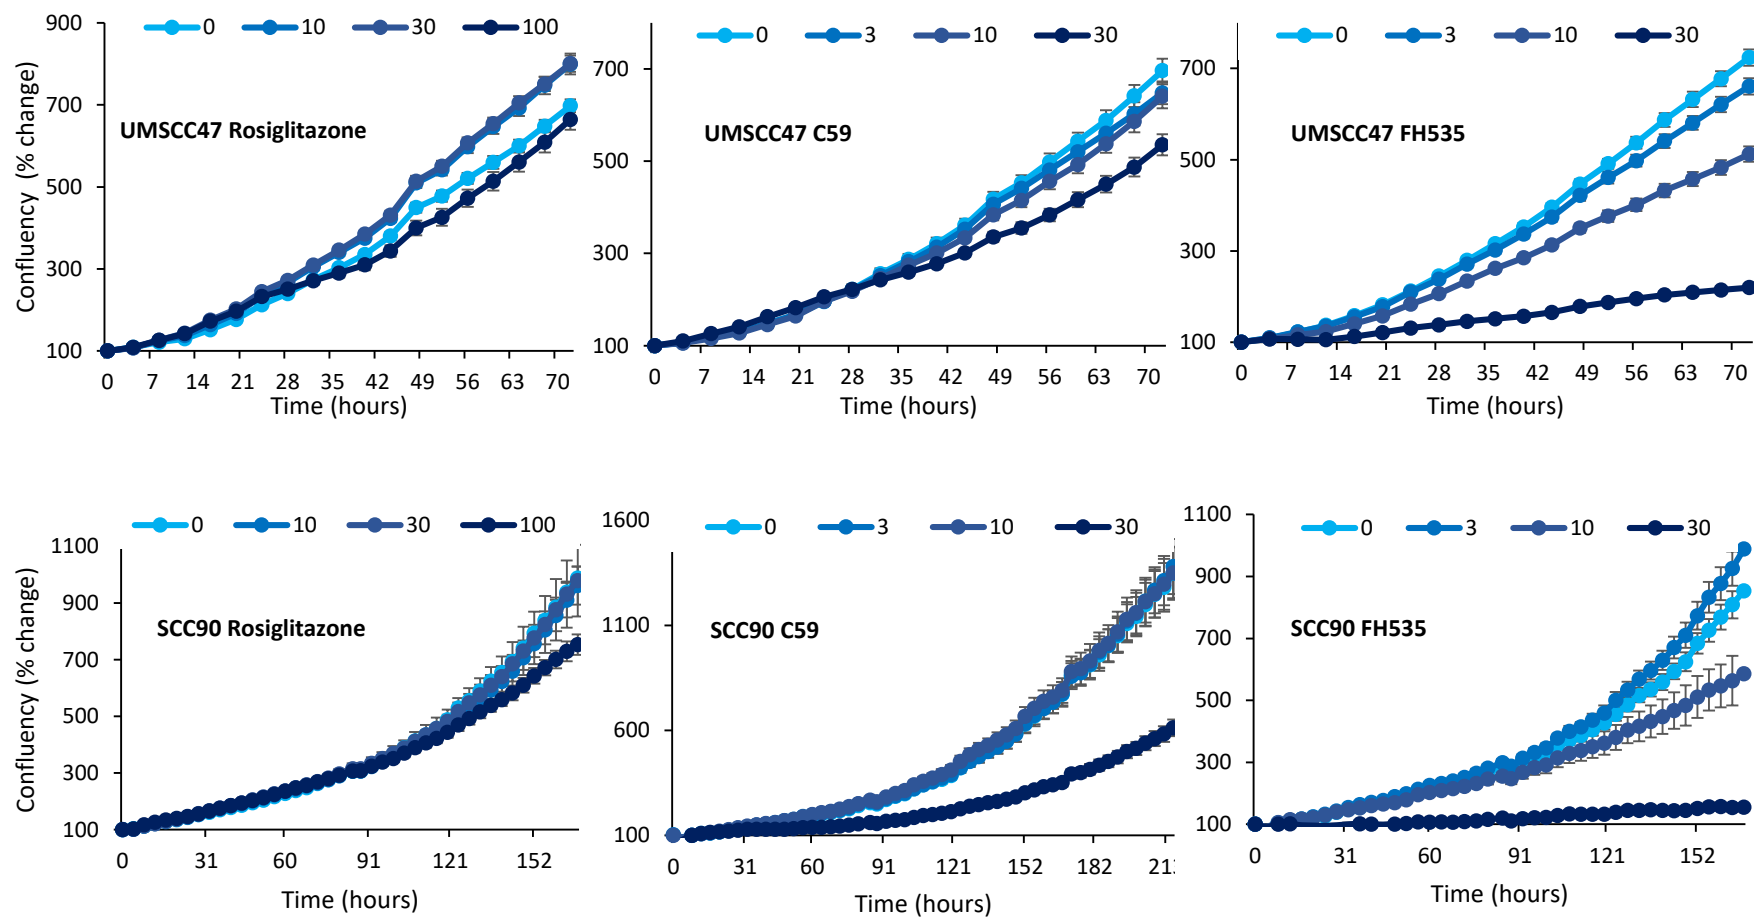

**Figure S2. PPAR $\alpha$  levels are unchanged following fenofibrate treatment in HPV16+ SCC.**

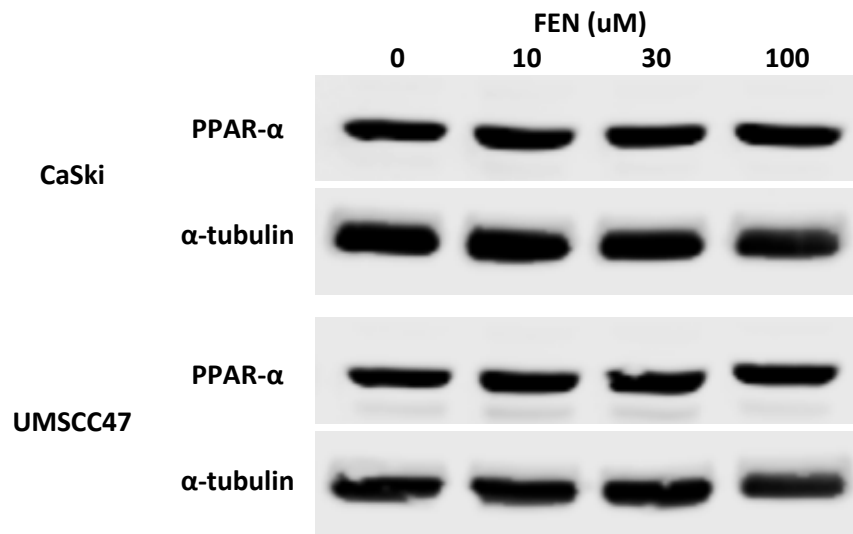

**Figure S3. Fenofibric acid (FA) does not inhibit proliferation of UMSCC47 cells.**

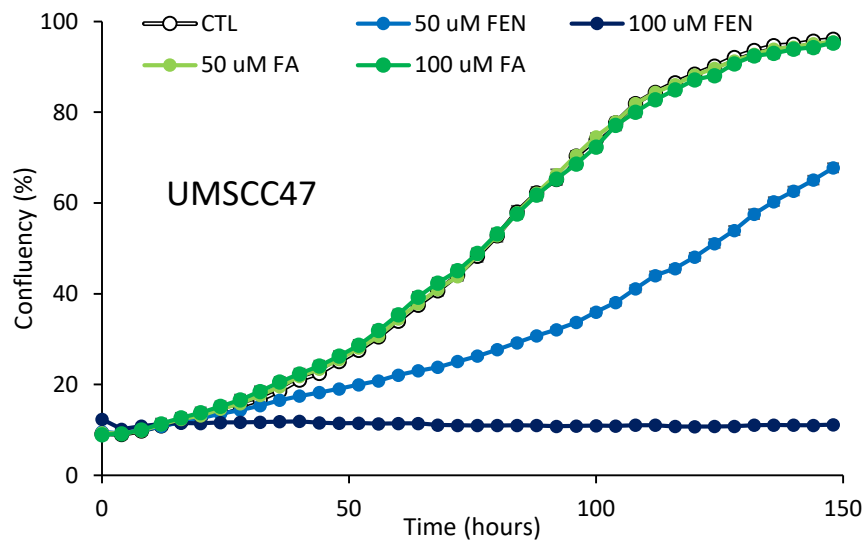

**Table S1. Enriched and depleted KEGG pathways in response to HPV16E6E7 knockdown in UMSCC47 cells.**

| Enriched                                              | FC  | p-value  | FDR      | Depleted                                         | FC   | p-value  | FDR      |
|-------------------------------------------------------|-----|----------|----------|--------------------------------------------------|------|----------|----------|
| hsa03010 Ribosome                                     | 4.8 | 2.58E-16 | 4.23E-14 | hsa04114 Oocyte meiosis                          | -3.8 | 3.23E-11 | 5.29E-09 |
| hsa00190 Oxidative phosphorylation                    | 3.8 | 6.81E-11 | 5.58E-09 | hsa04110 Cell cycle                              | -3.7 | 1.37E-10 | 8.75E-09 |
| hsa00980 Metabolism of xenobiotics by cytochrome P450 | 3.7 | 3.81E-10 | 2.08E-08 | hsa04520 Adherens junction                       | -3.7 | 1.60E-10 | 8.75E-09 |
| hsa00982 Drug metabolism - cytochrome P450            | 3.3 | 9.69E-09 | 3.97E-07 | hsa04914 Progesterone-mediated oocyte maturation | -3.6 | 6.76E-10 | 2.77E-08 |
| hsa04115 p53 signaling pathway                        | 2.8 | 7.82E-07 | 2.57E-05 | hsa03013 RNA transport                           | -3.2 | 2.03E-08 | 6.66E-07 |
| hsa00280 Valine, leucine and isoleucine degradation   | 2.8 | 9.77E-07 | 2.67E-05 | hsa04910 Insulin signaling pathway               | -2.9 | 2.89E-07 | 7.90E-06 |
| hsa00140 Steroid hormone biosynthesis                 | 2.7 | 3.00E-06 | 6.56E-05 | hsa04350 TGF-beta signaling pathway              | -2.6 | 5.95E-06 | 0.000139 |
| hsa00380 Tryptophan metabolism                        | 2.7 | 3.20E-06 | 6.56E-05 | hsa04144 Endocytosis                             | -2.4 | 2.33E-05 | 0.000477 |
| hsa00640 Propanoate metabolism                        | 2.7 | 4.06E-06 | 7.40E-05 | hsa03015 mRNA surveillance pathway               | -2.3 | 2.91E-05 | 0.000531 |
| hsa00071 Fatty acid metabolism                        | 2.5 | 1.47E-05 | 0.000241 | hsa04540 Gap junction                            | -2.3 | 5.04E-05 | 0.000752 |
| hsa04146 Peroxisome                                   | 2.3 | 2.95E-05 | 0.000439 | hsa04810 Regulation of actin cytoskeleton        | -2.2 | 5.45E-05 | 0.000752 |
| hsa00650 Butanoate metabolism                         | 2.4 | 3.89E-05 | 0.000532 | hsa04320 Dorso-ventral axis formation            | -2.3 | 5.51E-05 | 0.000752 |
| hsa00590 Arachidonic acid metabolism                  | 2.2 | 7.61E-05 | 0.000921 | hsa03008 Ribosome biogenesis in eukaryotes       | -2.2 | 0.000112 | 0.00141  |
| hsa04610 Complement and coagulation cascades          | 2.2 | 7.86E-05 | 0.000921 | hsa03040 Spliceosome                             | -2.1 | 0.000125 | 0.00146  |
| hsa04974 Protein digestion and absorption             | 2.2 | 8.81E-05 | 0.000963 | hsa04360 Axon guidance                           | -2   | 0.000283 | 0.003091 |
| hsa04260 Cardiac muscle contraction                   | 2.1 | 0.00013  | 0.001332 | hsa00510 N-Glycan biosynthesis                   | -2   | 0.000316 | 0.003241 |
| hsa00620 Pyruvate metabolism                          | 2.1 | 0.000153 | 0.001477 | hsa04310 Wnt signaling pathway                   | -2   | 0.000358 | 0.003457 |
| hsa00340 Histidine metabolism                         | 2.1 | 0.000252 | 0.0023   | hsa04012 ErbB signaling pathway                  | -1.9 | 0.000514 | 0.004688 |
| hsa00920 Sulfur metabolism                            | 2.1 | 0.00028  | 0.002418 | hsa04062 Chemokine signaling pathway             | -1.8 | 0.001251 | 0.010796 |
| hsa00480 Glutathione metabolism                       | 1.9 | 0.000607 | 0.004974 | hsa04010 MAPK signaling pathway                  | -1.7 | 0.001617 | 0.013261 |
| hsa04623 Cytosolic DNA-sensing pathway                | 1.9 | 0.000637 | 0.004974 | hsa03030 DNA replication                         | -1.7 | 0.00215  | 0.016789 |
| hsa03320 PPAR signaling pathway                       | 1.9 | 0.000721 | 0.005371 | hsa04720 Long-term potentiation                  | -1.6 | 0.002792 | 0.020813 |

**Table S2. Enriched and depleted KEGG pathways in response to fenofibrate treatment in UMSCC47 cells.**

| Pathway                                             | DE genes | All genes | p-value    |
|-----------------------------------------------------|----------|-----------|------------|
| Ribosome                                            | 55       | 130       | 1.00E-24   |
| Oxidative phosphorylation                           | 31       | 106       | 1.35E-12   |
| Alzheimer disease                                   | 32       | 140       | 1.4111E-06 |
| Parkinson disease                                   | 32       | 111       | 1.9835E-06 |
| Non-alcoholic fatty liver disease (NAFLD)           | 30       | 129       | 4.0637E-06 |
| Huntington disease                                  | 36       | 156       | 5.2749E-06 |
| Thermogenesis                                       | 38       | 183       | 7.0668E-06 |
| Cardiac muscle contraction                          | 11       | 39        | 3.6692E-05 |
| Ribosome biogenesis in eukaryotes                   | 15       | 71        | 6.4002E-05 |
| Steroid biosynthesis                                | 7        | 17        | 6.7204E-05 |
| Retrograde endocannabinoid signaling                | 15       | 86        | 0.00160234 |
| Mineral absorption                                  | 8        | 32        | 0.00248638 |
| Proteasome                                          | 8        | 42        | 0.00637399 |
| Cytokine-cytokine receptor interaction              | 13       | 109       | 0.00743111 |
| Spliceosome                                         | 16       | 128       | 0.01244393 |
| p53 signaling pathway                               | 11       | 64        | 0.01639304 |
| Salmonella infection                                | 10       | 71        | 0.01716173 |
| Metabolic pathways                                  | 86       | 1029      | 0.02190162 |
| Parathyroid hormone synthesis, secretion and action | 11       | 78        | 0.04683979 |
