# Supplementary material for: Repositioning Fenofibrate to Reactivate p53 and Reprogram the Tumor-Immune Microenvironment in HPV+ Head and Neck Squamous Cell Carcinoma
Source: MDPI journal article supplement (doi:10.3390/cancers14020282), 2022-01-07
Supplement: s1 [file s1]

## Supplemental Data: Blots with Densitometry

Figure 1B

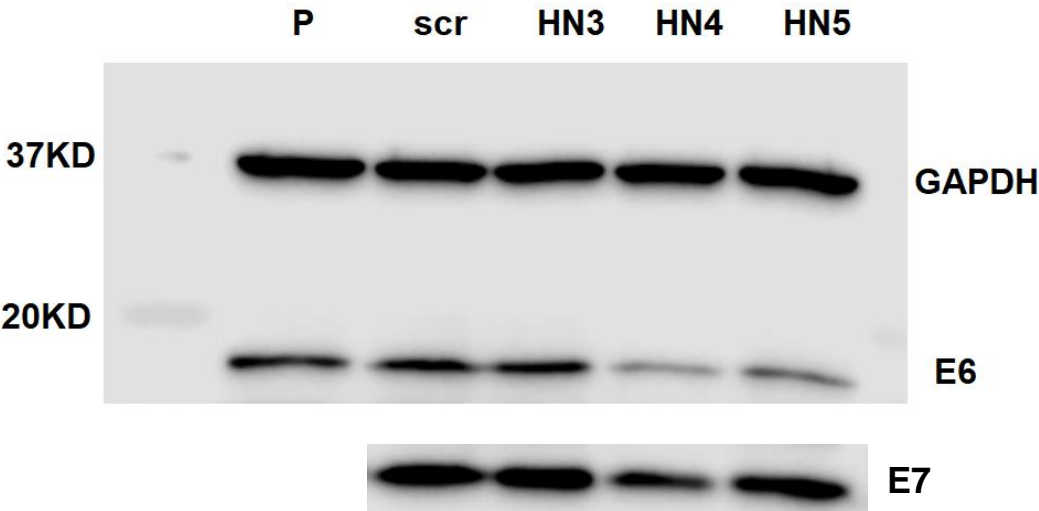

|           |           |        |        |        |          |          |           |          |          |        |
|-----------|-----------|--------|--------|--------|----------|----------|-----------|----------|----------|--------|
| Figure 1B |           |        |        |        |          |          |           |          |          |        |
|           | CTL (scr) | shRNA3 | shRNA4 | shRNA5 |          |          | CTL (scr) | shRNA3   | shRNA4   | shRNA5 |
| E6        | 31466     | 30960  | 19066  | 22606  | E6/GAPDH | 0.592468 | 0.615336  | 0.34612  | 0.37761  |        |
| E7        | 54480     | 54289  | 40186  | 58972  | E7/GAPDH | 1.025796 | 1.079004  | 0.729527 | 0.985067 |        |
| GAPDH     | 53110     | 50314  | 55085  | 59866  |          |          |           |          |          |        |
|           |           |        |        |        | E6/GAPDH | 1        | 1.038597  | 0.584199 | 0.63735  |        |
|           |           |        |        |        | E7/GAPDH | 1        | 1.05187   | 0.711182 | 0.960295 |        |

Figure 6C

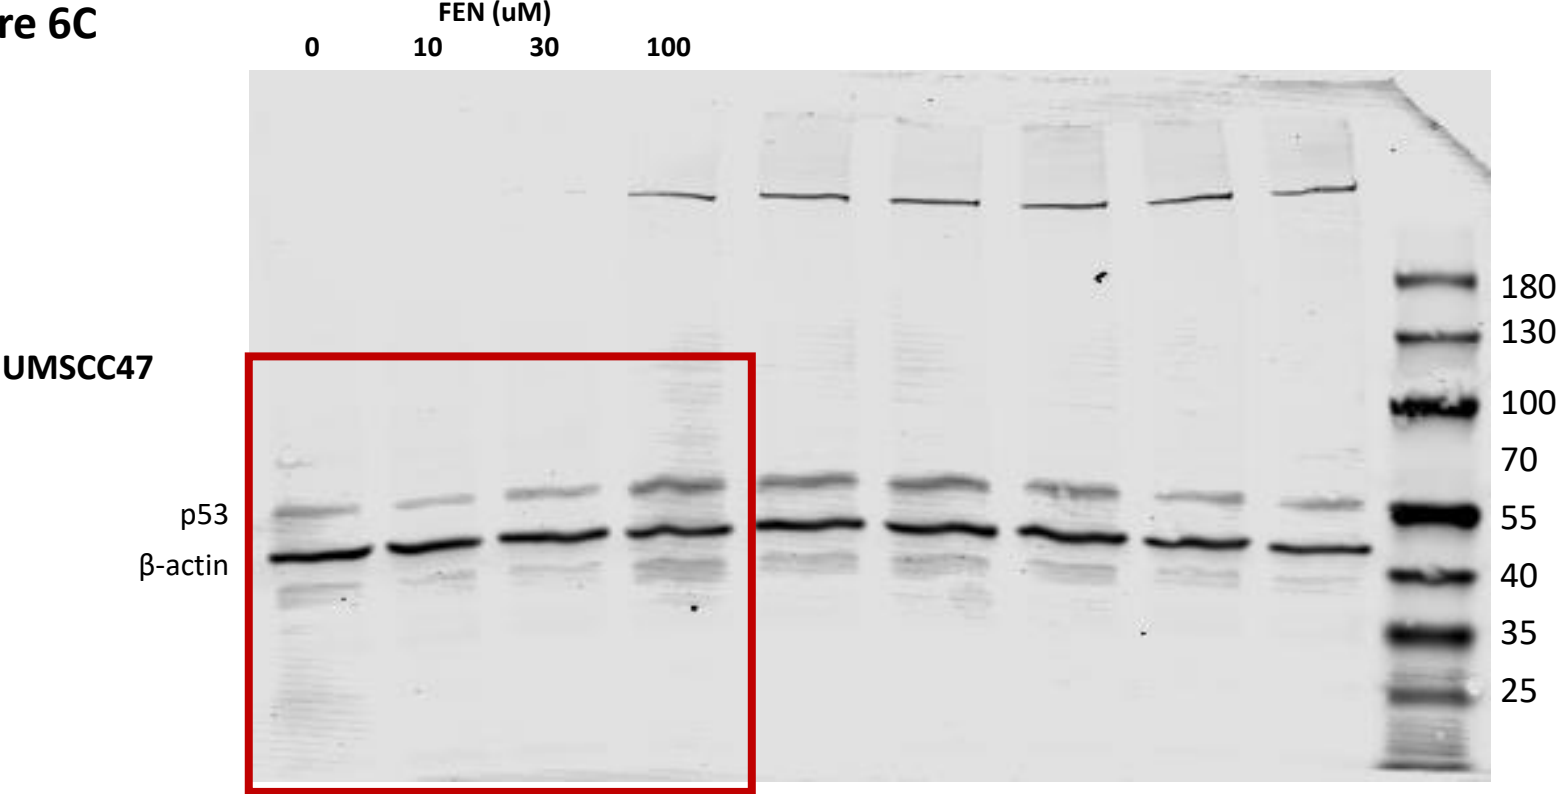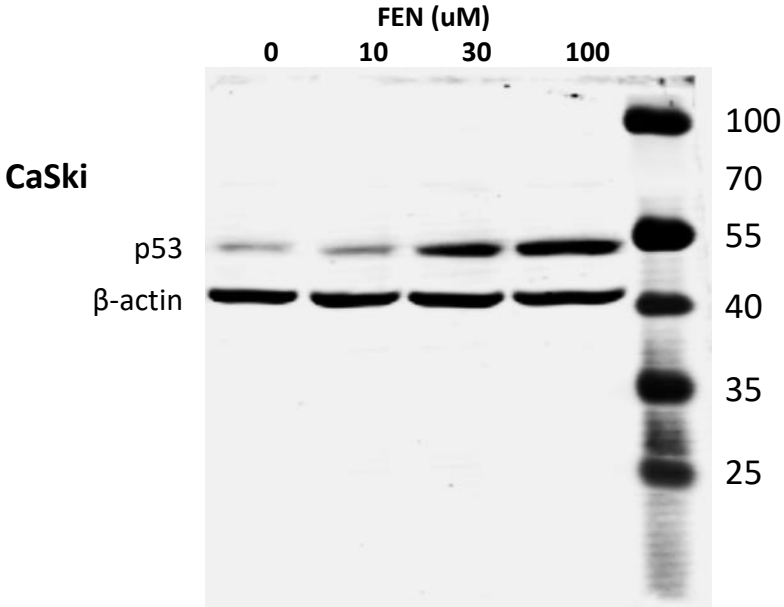

|                     | FEN (uM) |         |         |         |
|---------------------|----------|---------|---------|---------|
| <b>UMSCC47</b>      | 0        | 10      | 30      | 100     |
| p53                 | 308      | 261     | 383     | 504     |
| $\beta$ -actin      | 19900    | 17700   | 19400   | 17800   |
| p53/ $\beta$ -actin | 0.01548  | 0.01475 | 0.01974 | 0.02832 |
| p53/ $\beta$ -actin | 1        | 1.23502 | 2.65714 | 4.52987 |
| <b>CaSki</b>        |          |         |         |         |
| p53                 | 238      | 268     | 651     | 1090    |
| $\beta$ -actin      | 27200    | 24800   | 28000   | 27500   |
| p53/ $\beta$ -actin | 0.00875  | 0.01081 | 0.02325 | 0.03964 |
| p53/ $\beta$ -actin | 1        | 1.23502 | 2.65714 | 4.52987 |

Figure 6E

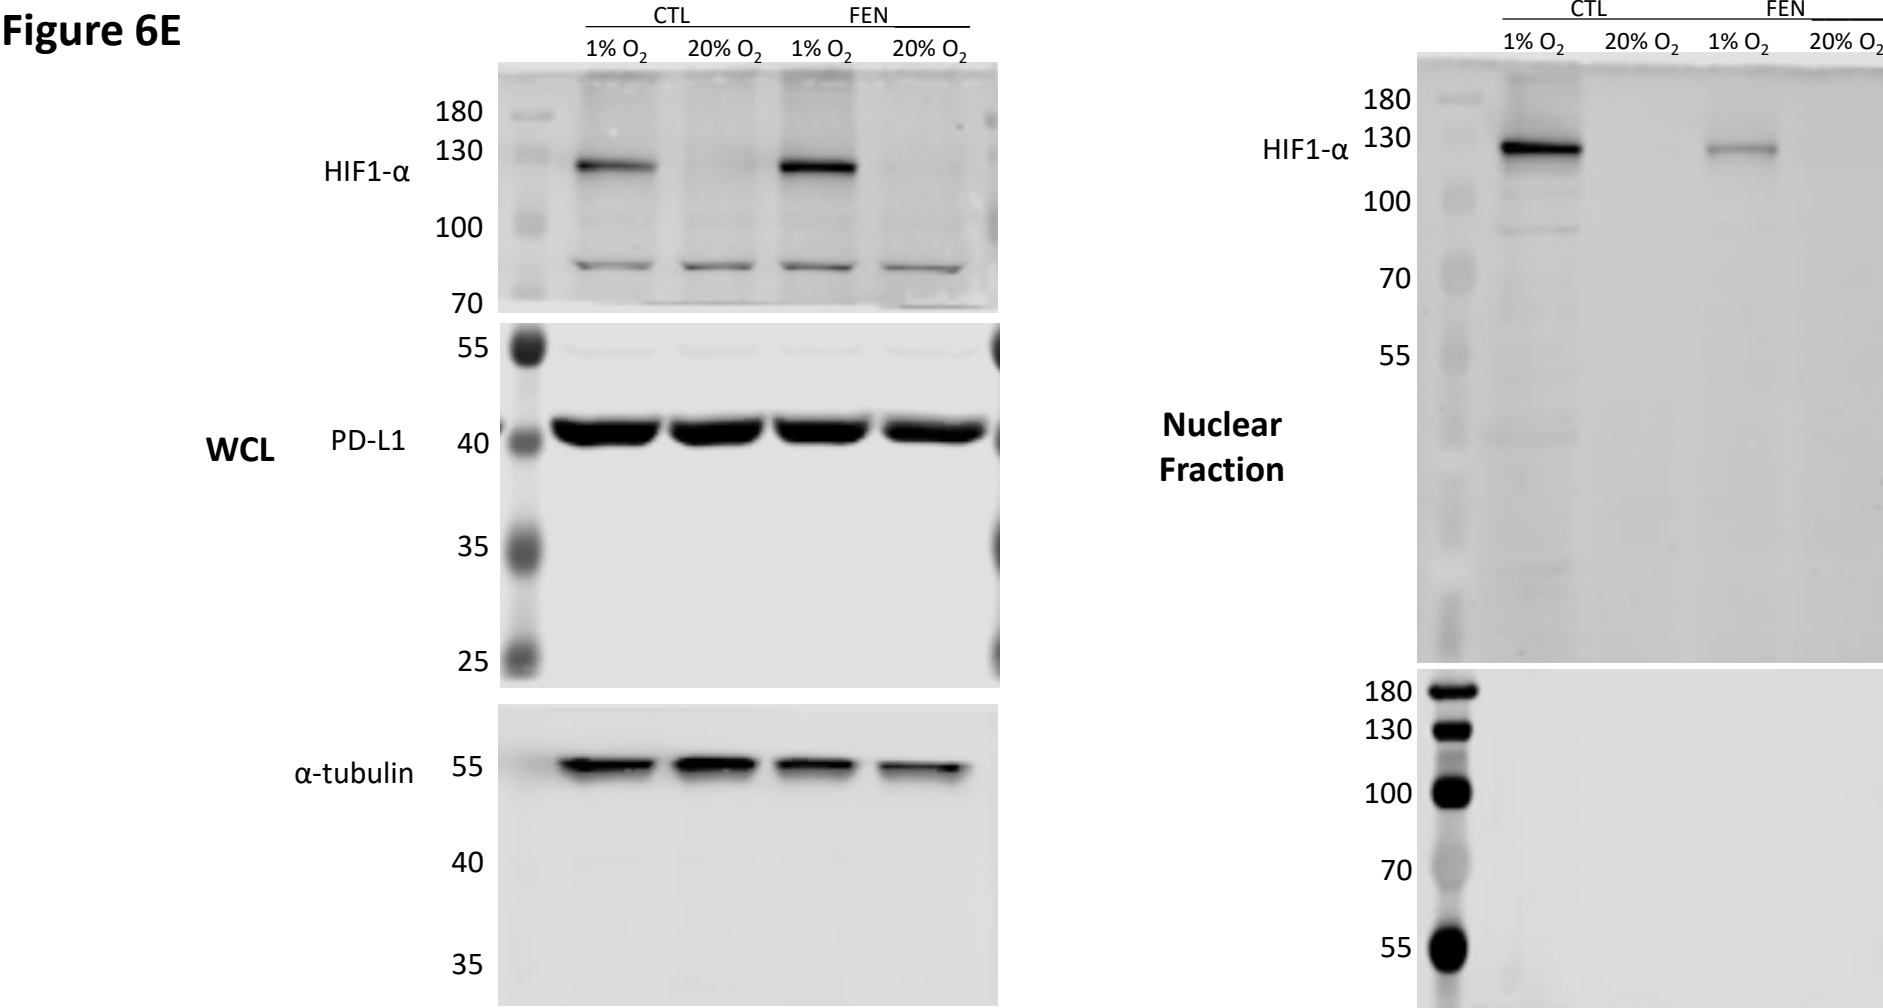

|                  | CTL               |                    | FEN               |                    |                  | CTL               |                    | FEN               |                    |
|------------------|-------------------|--------------------|-------------------|--------------------|------------------|-------------------|--------------------|-------------------|--------------------|
|                  | 1% O <sub>2</sub> | 20% O <sub>2</sub> | 1% O <sub>2</sub> | 20% O <sub>2</sub> |                  | 1% O <sub>2</sub> | 20% O <sub>2</sub> | 1% O <sub>2</sub> | 20% O <sub>2</sub> |
| WCL              |                   |                    |                   |                    | Nuclear Fraction |                   |                    |                   |                    |
| HIF1-α           | 1220              | 80.6               | 1960              | 62.6               | HIF1-α           | 3580              | 30.5               | 784               | 49.2               |
| PD-L1            | 101000            | 84400              | 82600             | 73100              | PD-L1            | 75000             | 4860               | 2530              | 2780               |
| α-tubulin        | 44400             | 43600              | 31700             | 25000              | HIF1-α           | 117.4             | 1                  | 25.7              | 1.6                |
| HIF1-α/α-tubulin | 0.027             | 0.002              | 0.062             | 0.003              | PD-L1            | 15.4              | 1                  | 0.5               | 0.6                |
| PD-L1/α-tubulin  | 2.275             | 1.936              | 2.606             | 2.924              |                  |                   |                    |                   |                    |
| HIF1-α/α-tubulin | 14.9              | 1                  | 33.4              | 1.4                |                  |                   |                    |                   |                    |
| PD-L1/α-tubulin  | 1.2               | 1                  | 1.3               | 1.5                |                  |                   |                    |                   |                    |

Figure S2

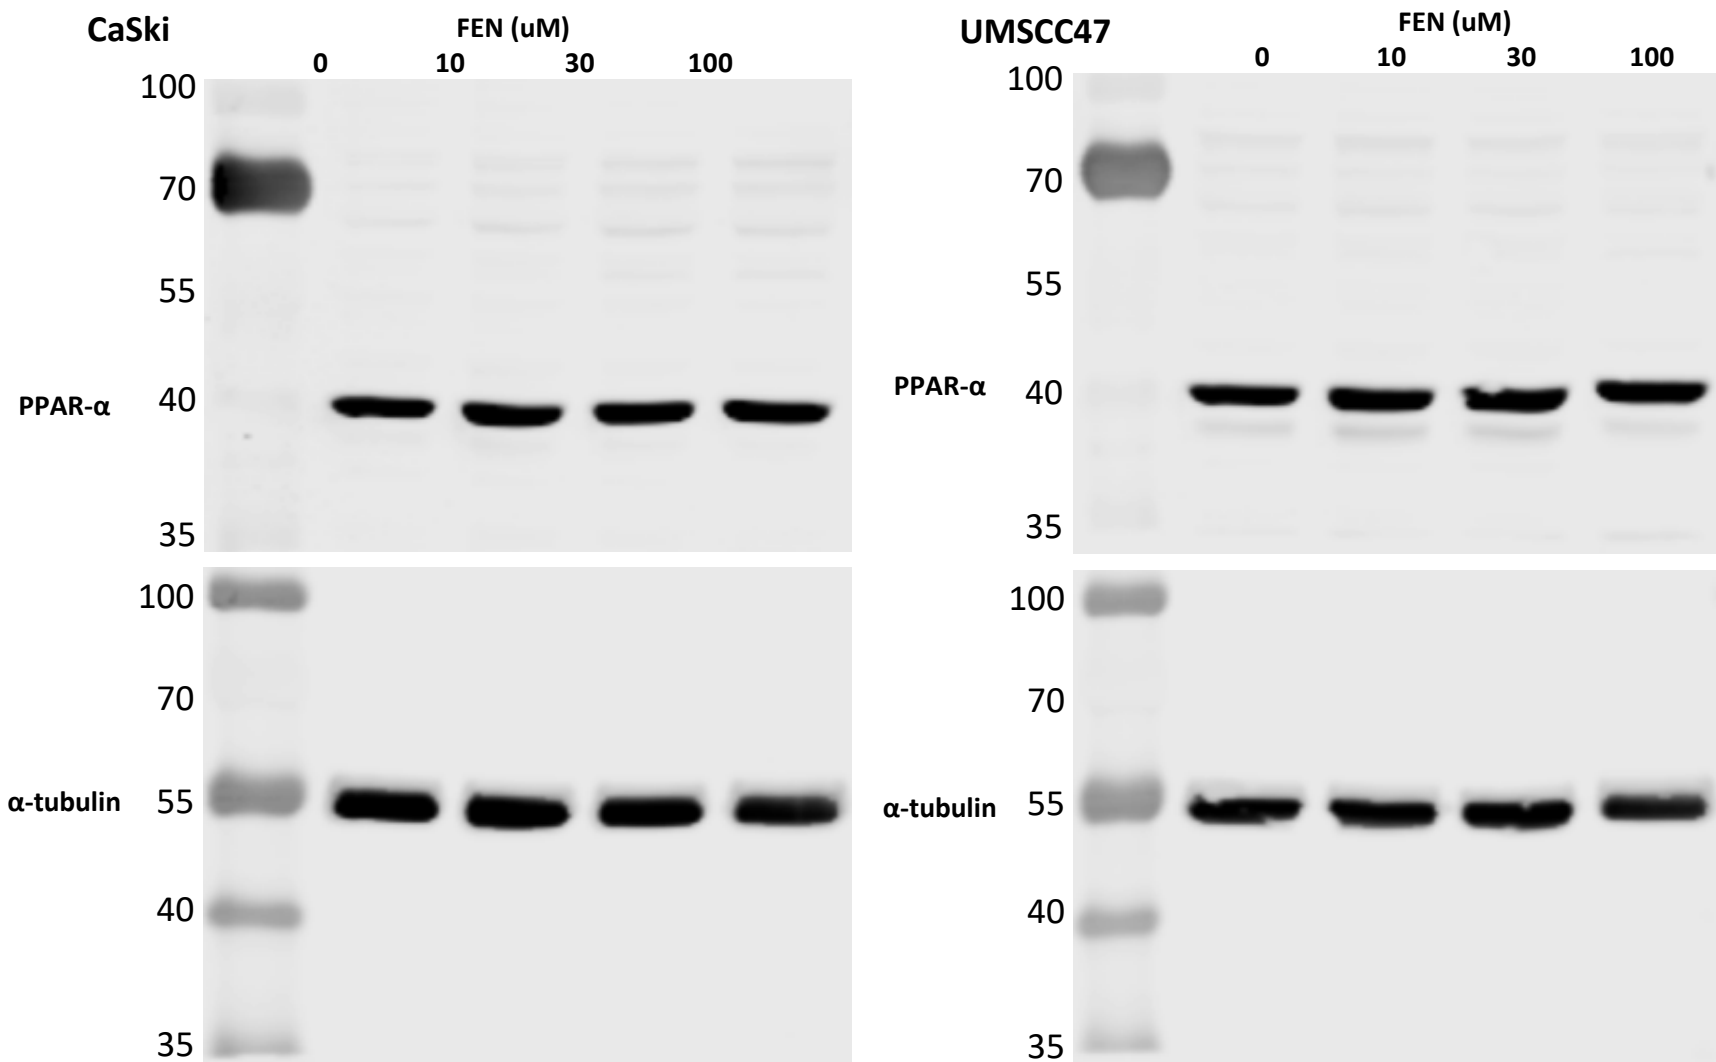

| FIG S2           | FEN (uM) |         |         |         |  |                  | FEN (uM) |         |         |         |
|------------------|----------|---------|---------|---------|--|------------------|----------|---------|---------|---------|
| CaSki            | 0        | 10      | 30      | 100     |  | UMSCC47          | 0        | 10      | 30      | 100     |
| PPAR-α           | 256000   | 275000  | 269000  | 284000  |  | PPAR-α           | 270000   | 301000  | 293000  | 297000  |
| α-tubulin        | 398000   | 409000  | 385000  | 348000  |  | α-tubulin        | 317000   | 337000  | 354000  | 299000  |
| PPAR-α/α-tubulin | 0.64322  | 0.67237 | 0.69870 | 0.81609 |  | PPAR-α/α-tubulin | 0.85174  | 0.89318 | 0.82768 | 0.99331 |
| PPAR-α/α-tubulin | 1        | 1.04533 | 1.08626 | 1.26877 |  | PPAR-α/α-tubulin | 1        | 1.04865 | 0.97176 | 1.16622 |
